# Supplementary material for: Nanoparticle-assisted structural tailoring of trehalose lipid biosynthesis by Rhodococcus erythropolis WJ-2
Source: Royal Society of Chemistry journal article supplement (doi:10.1039/d5ra09253a), 2026-01-01
Supplement: d5ra09253a1.pdf [file d5ra09253a1.pdf]

### Supplementary Materials

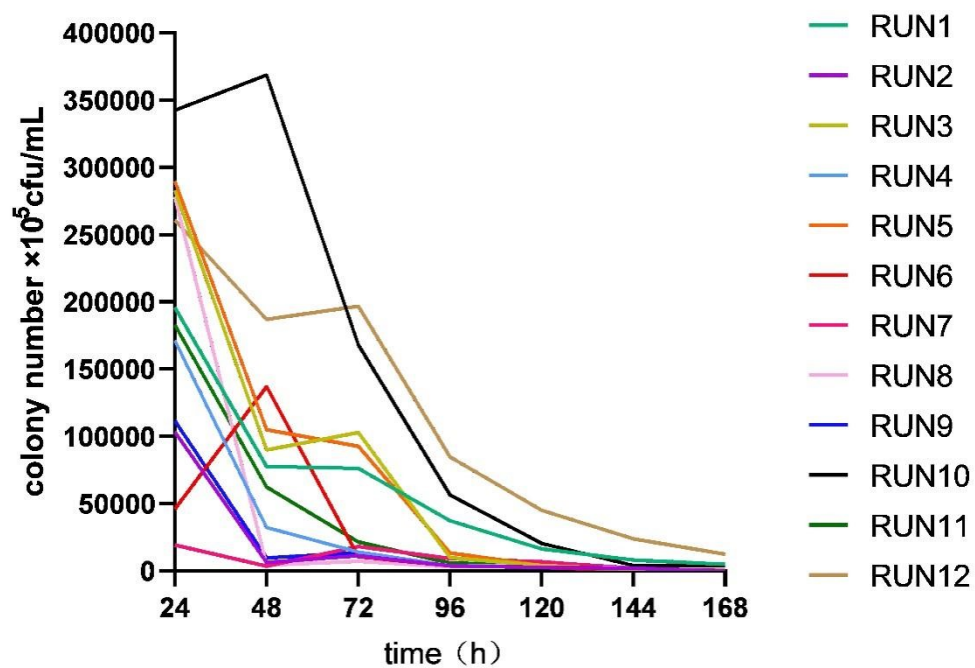

Fig. 1. Strain growth curve

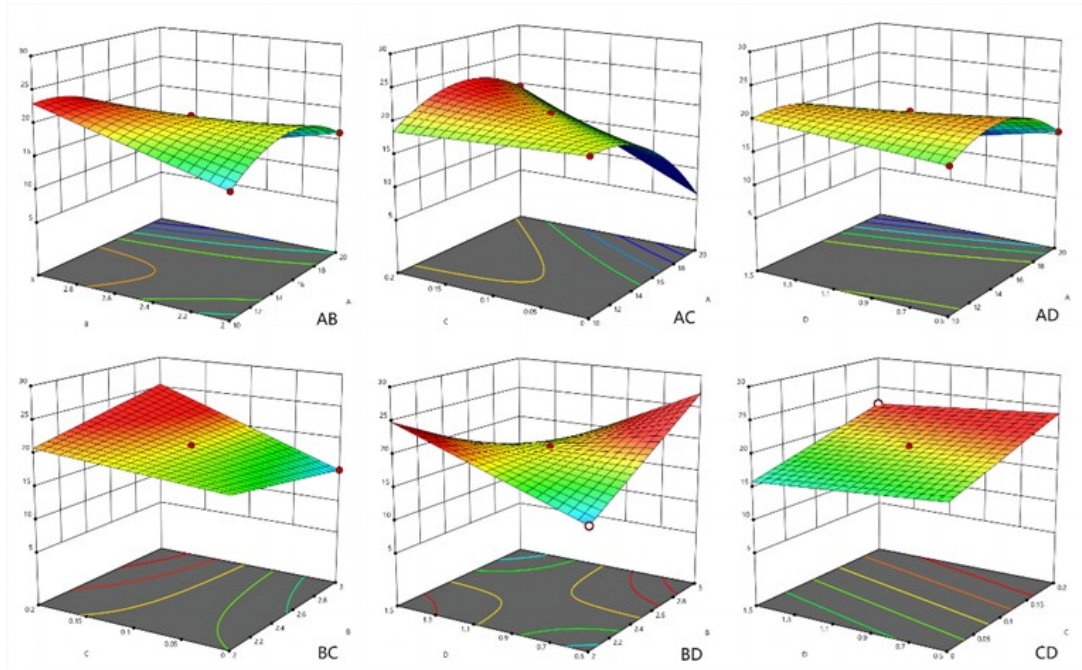

Fig. 2. Response surface plots of the interaction of variables A, B, C and D

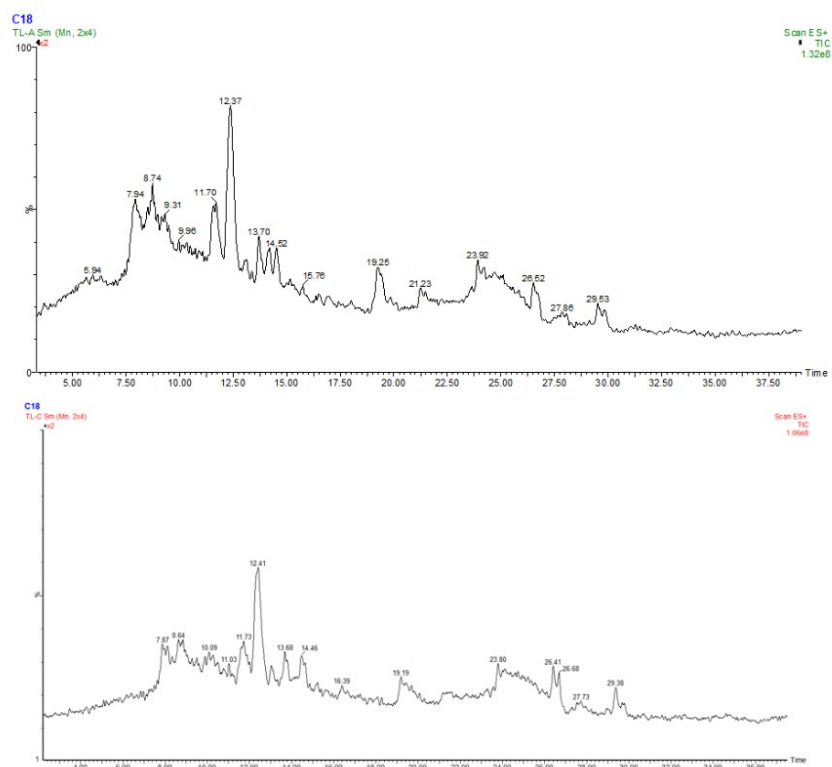

Fig.3. Chromatograms before and after the addition of nano-Fe<sub>2</sub>O<sub>3</sub>
